# Supplementary material for: A Cysteine-Rich Protein, SpDIR1L, Implicated in S-RNase-Independent Pollen Rejection in the Tomato (Solanum Section Lycopersicon) Clade
Source: MDPI journal article supplement (doi:10.3390/ijms222313067), 2021-12-02
Supplement: s1 [file s1]

## Supplementary Materials

**(a)**

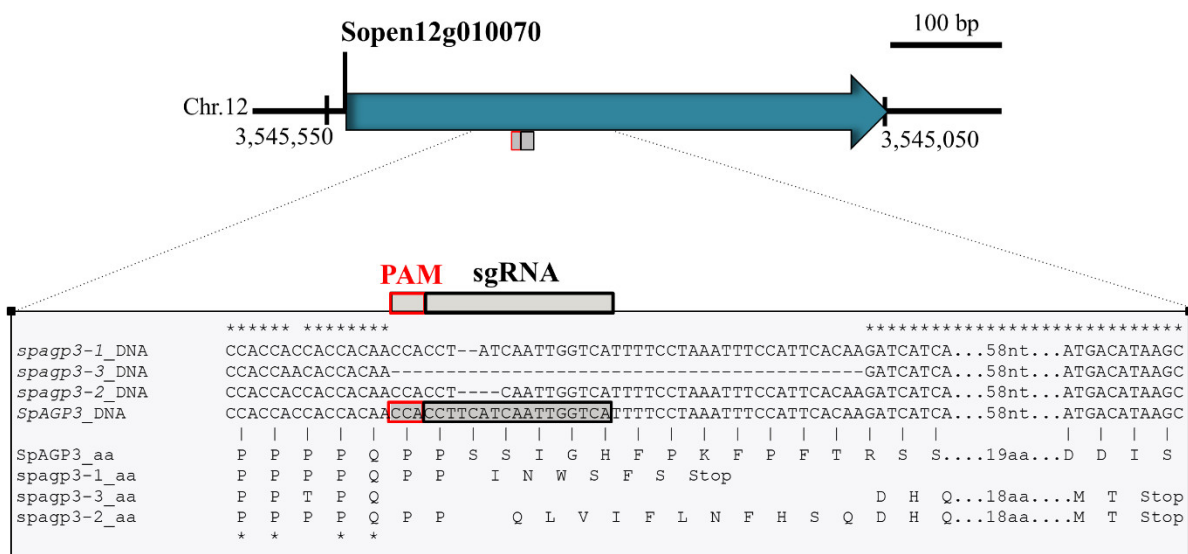

(b)

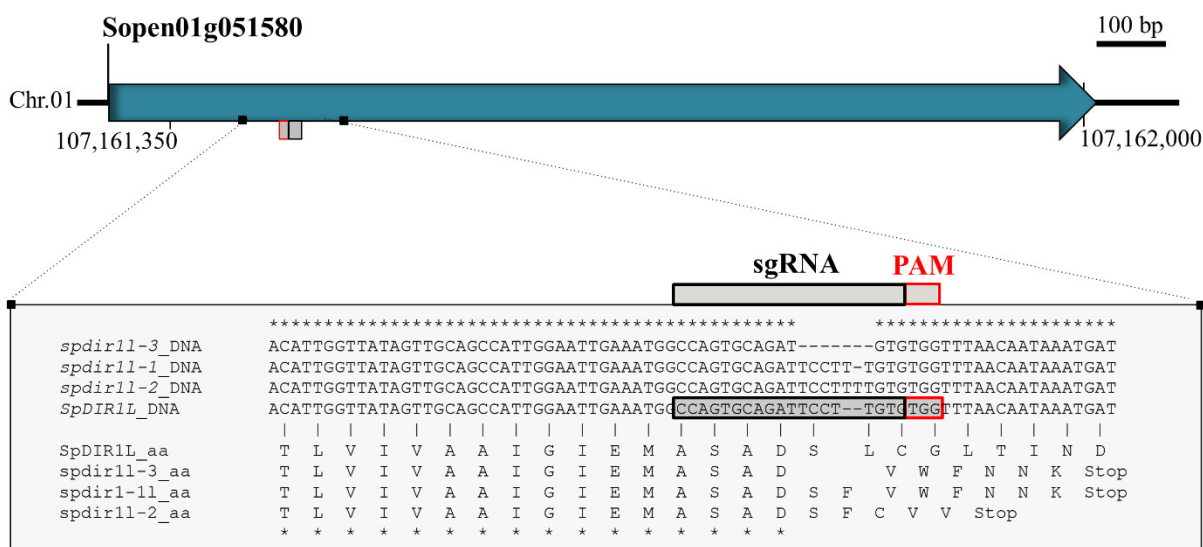

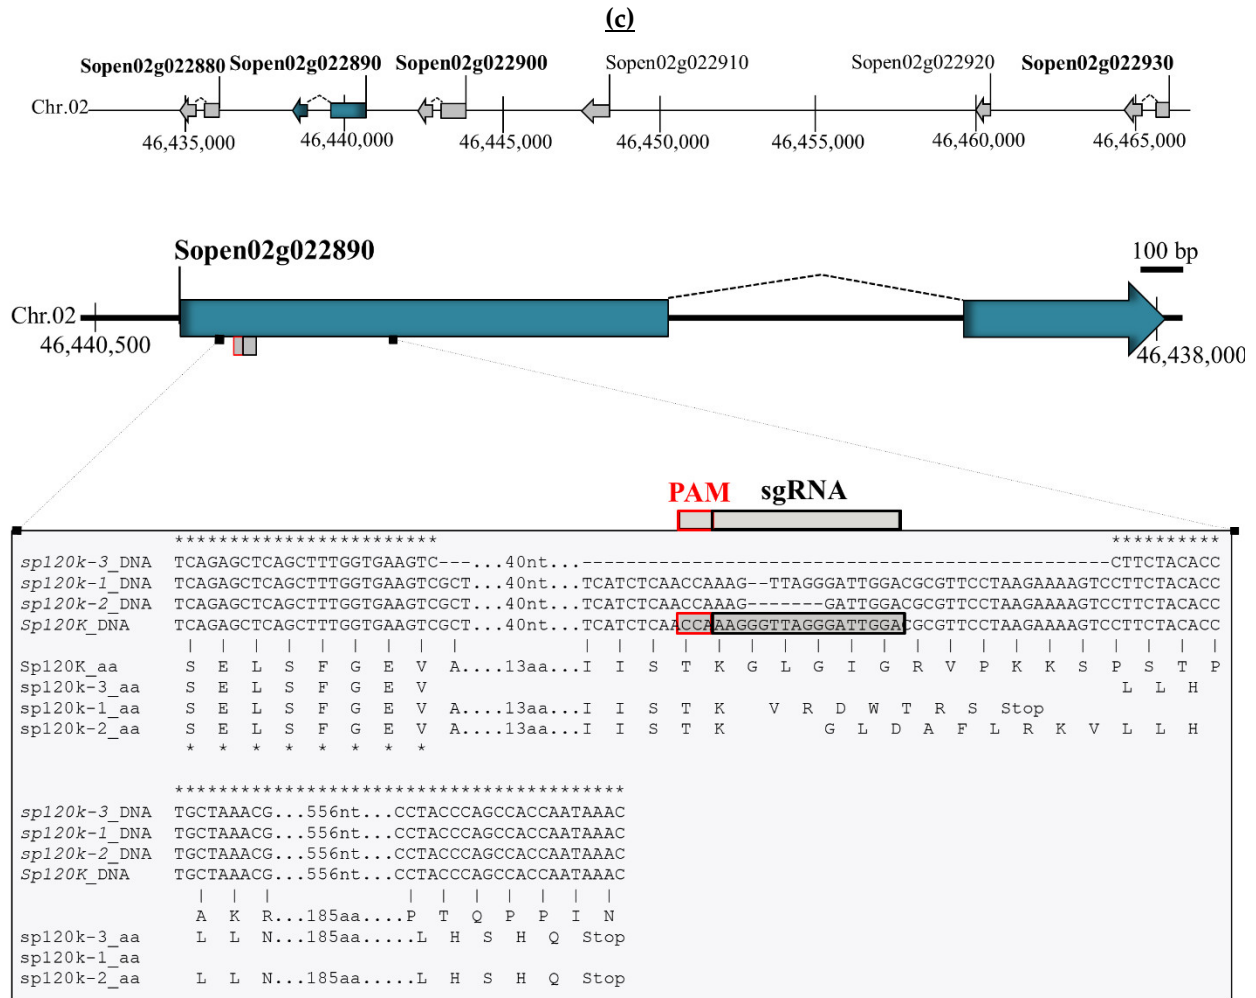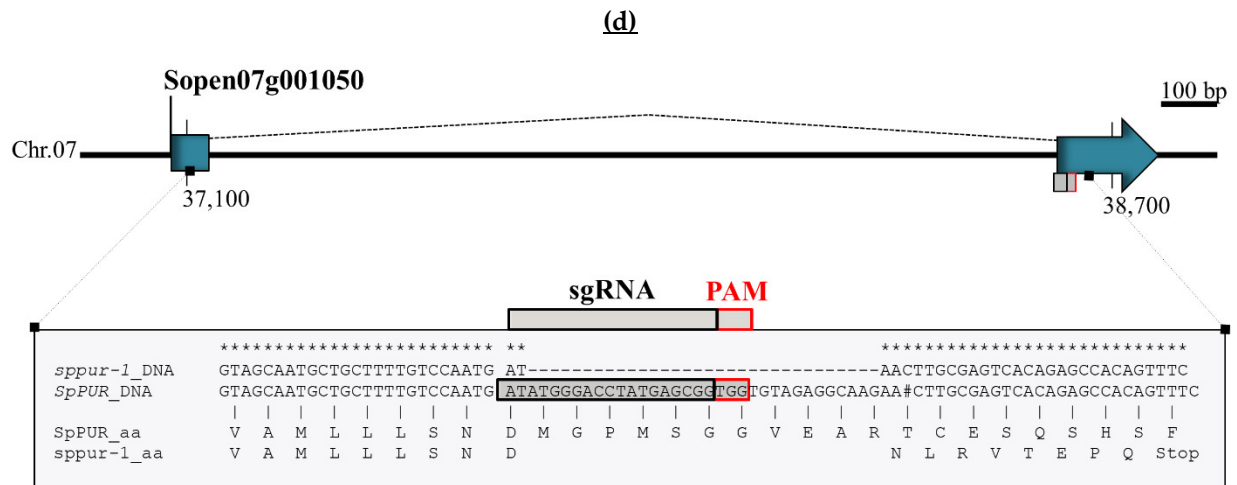

(e)

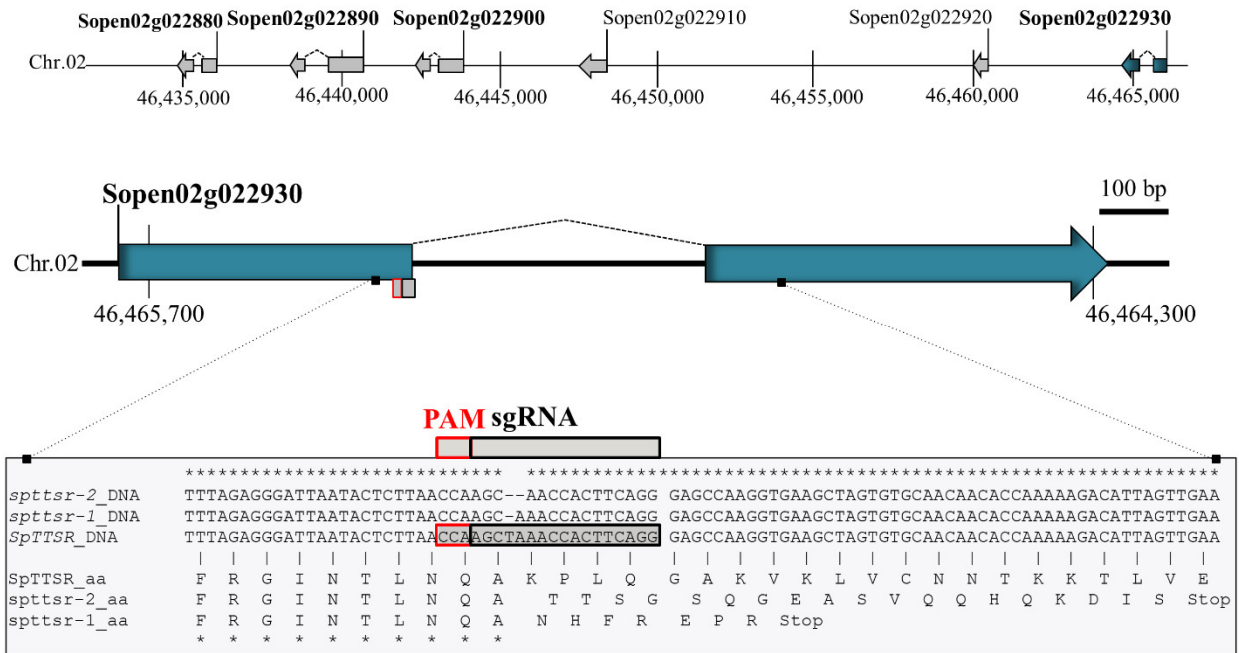

(f)

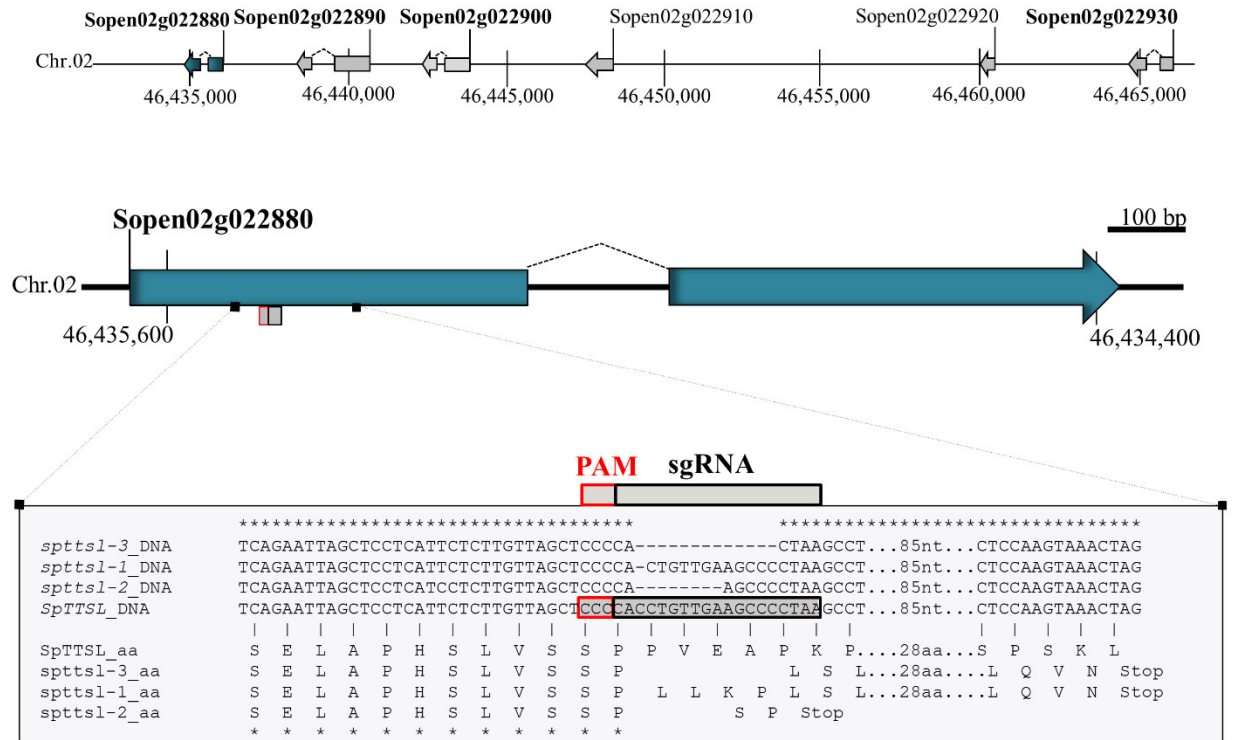

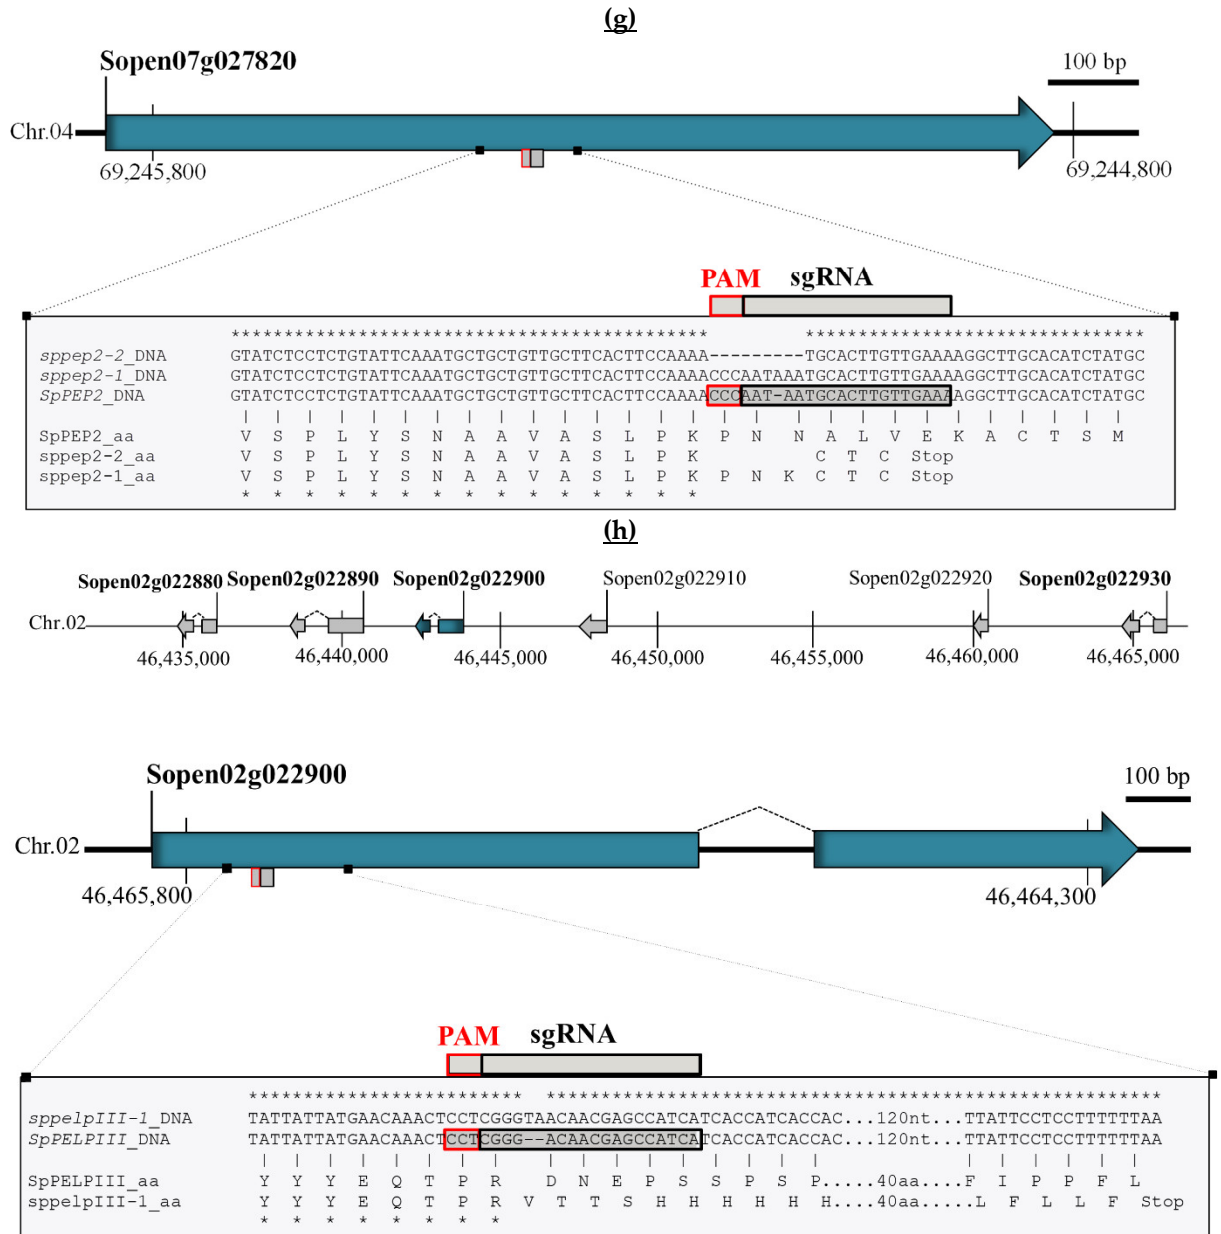

**Figure S1. Loss of function mutations.** Each panel shows the relevant *S. pennellii* LA0716 gene model including sequence coordinates, exons (blue arrows), and a 100bp scale bar. Boxes below show the CRISPR/Cas9 target, sgRNA and PAM sequences. Relevant sequences of the wild type and loss of function mutations are shown below. Asterisks, identical nucleotides or amino acids. Premature termination codons are indicated as "Stop". Splicing site, space in the sequence. (a) *SpAGP3*, (b) *SpDIR1L*, (c) *Sp120k*, (d), *SpPUR* (e) *SpTTSR*, (f) *SpTTSI*, (g) *SpPEP2* and (h) *SpPELPIII*. For (c), (d), (e) and (f) the chromosome 2 region including all four genes is shown.

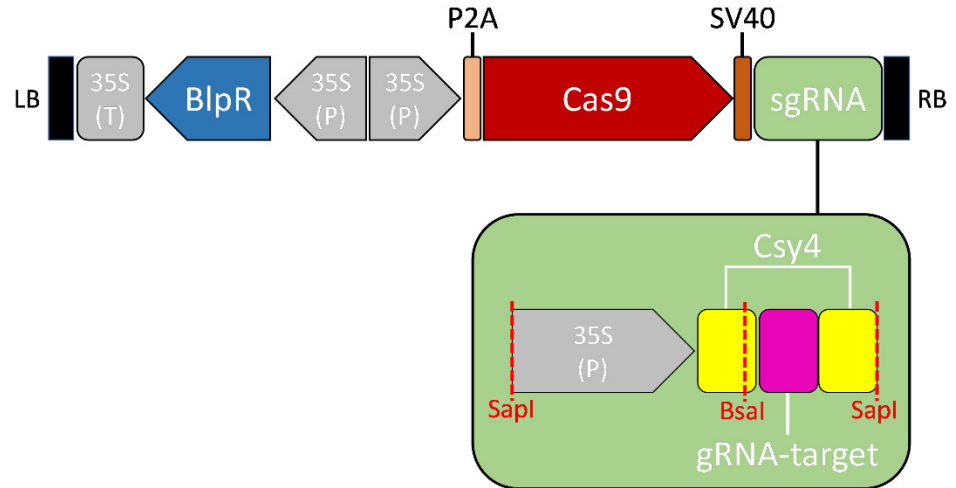

**Figure S2. Schematic of pRLG108 CRISPR/Cas9 constructs.** The sgRNA encoding region is enlarged showing Cys4 cleavage sites and BsaI-SapI sites for gene-specific inserts (Table S3).

**Table S1. *Solanum lycopersicum* pollen tube growth in styles of LA0716 transgenic lines and wild type.**

| Gene           | LOF allele       | Style length (mm) | Most metric (% of style)       | Longest metric (% of style)    |
|----------------|------------------|-------------------|--------------------------------|--------------------------------|
| <b>LA0716</b>  |                  | <b>7.17±0.76</b>  | <b>1.72±0.51 (23.98±7.79%)</b> | <b>2.02±0.53 (28.17±8.00%)</b> |
| <i>SpPEP2</i>  | <i>sppep2-1</i>  | 8.34±0.51         | 1.45±0.84 (17.38±9.05%)        | 1.55±0.93 (18.58±10.05%)       |
|                | <i>sppep2-2</i>  | 6.98±0.23         | 0.86±0.36 (12.32±5.38%)        | 1.11±0.49 (15.9±7.40%)         |
| <i>SpTTSL</i>  | <i>spttsl-1</i>  | 8.91±0.90         | 1.87±0.56 (20.98±6.92%)        | 2.14±0.37 (24.01±5.36%)        |
|                | <i>spttsl-2</i>  | 6.93±0.70         | 1.62±0.33 (23.37±5.06%)        | 1.89±0.53 (27.27±8.53%)        |
|                | <i>spttsl-3</i>  | 7.41±0.54         | 1.24±0.57 (16.73±7.07%)        | 2.02±0.74 (27.26±9.81%)        |
| <i>SpTTSR</i>  | <i>spttsr-1</i>  | 6.76±0.43         | 1.22±0.52 (18.04±7.15%)        | 1.73±0.72 (25.59±9.66%)        |
|                | <i>spttsr-2</i>  | 8.07±0.27         | 1.99±0.45 (24.65±5.97%)        | 2.42±0.64 (29.98±8.48%)        |
| <i>SpAGP3</i>  | <i>agp3-1</i>    | 6.61±0.18         | 1.61±0.38 (24.35±7.83%)        | 1.94±0.47 (29.34±6.71%)        |
|                | <i>agp3-2</i>    | 7.61±0.51         | 1.53±0.36 (20.1±4.45%)         | 2.72±0.35 (35.74±6.27%)        |
|                | <i>agp3-3</i>    | 6.97±0.44         | 1.58±0.33 (22.66±5.71%)        | 2.09±0.39 (29.98±6.13%)        |
| <i>Sp120k</i>  | <i>Sp120k-1</i>  | 6.61±0.45         | 1.76±0.53 (26.62±8.61%)        | 2.13±0.47 (32.22±7.64%)        |
|                | <i>Sp120k-2</i>  | 7.13±0.42         | 2.06±0.44 (29.51±7.14%)        | 2.21±0.65 (30.99±10.13%)       |
|                | <i>Sp120k-3</i>  | 7.86±0.87         | 2.32±0.63 (29.51±6.92%)        | 2.66±0.24 (33.84±2.61%)        |
| <i>SpPELP3</i> | <i>sppelp3-1</i> | 7.54±0.79         | 2.22±0.64 (29.44±9.85%)        | 2.44±0.53 (32.36±8.34%)        |
| <i>SpPur</i>   | <i>sppur-1</i>   | 6.9±0.36          | 2.16±0.59 (31.3±8.67%)         | 3.03±1.06 (43.91±16.01%)       |
| <i>SpDIR1L</i> | <i>spdir1l-1</i> | 7.39±0.71         | 2.53±0.68 (34.23±9.91%)        | 3.27±1.17 (44.24±15.77%)       |
|                | <i>spdir1l-2</i> | 6.94±0.83         | 3.24±0.98 (46.68±15.16%)       | 3.96±1.34 (57.06±21.13%)       |
|                | <i>spdir1l-3</i> | 7.22±0.76         | 2.8±1.05 (38.78±14.15%)        | 4.01±1.88 (55.54±23.77%)       |

(a) Mean and standard deviation of most and longest pollen tube metrics for loss of function (LOF) mutants and controls (yellow).

| Gene           | df | Most metric |        |         | Longest metric |        |         |
|----------------|----|-------------|--------|---------|----------------|--------|---------|
|                |    | Mean±SD     | chi-sq | p-value | Mean±SD        | chi-sq | p-value |
| <i>SpPEP2</i>  | 1  | 14.7±7.5%   | 0.641  | 0.423   | 17.1±8.5%      | 0.025  | 0.872   |
| <i>SpTTSL</i>  | 2  | 19.7±7.0%   | 4.35   | 0.113   | 26.6±8.3%      | 0.557  | 0.756   |
| <i>SpTTSR</i>  | 1  | 22.0±7.1%   | 2.907  | 0.088   | 25.1±8.9%      | 1.114  | 0.291   |
| <i>SpAGP3</i>  | 2  | 22.5±5.9%   | 0.929  | 0.628   | 28.8±6.5%      | 1.71   | 0.425   |
| <i>Sp120k</i>  | 2  | 28.4±7.5%   | 2.009  | 0.366   | 32.4±7.8%      | 2.664  | 0.263   |
| <i>SpPELP3</i> | -  | 29.9±9.8%   | -      | -       | 32.8±8.3%      | -      | -       |
| <i>SpPUR</i>   | -  | 31.4±8.7%   | -      | -       | 44.2±16.0%     | -      | -       |
| <i>SpDIR1L</i> | 2  | 41.6±14.4%  | 4.215  | 0.121   | 54.2±21.1%     | 1.354  | 0.508   |

(b) Effects of *S. lycopersicum* pollen tube rejection on different alleles (where available) of the same candidate. Separate Kruskal–Wallis one-way analysis of variance to tests were applied to each metric. Tests show no significant difference between alleles supporting pooling data in Figure 2.

**Table S2.** Kruskal-Wallis one-way analysis of variance to tests comparing loss of function mutations to control. P-values for most and longest metrics are shown.

| Candidate gene knock-out | P-values             |                      |
|--------------------------|----------------------|----------------------|
|                          | Most of pollen tubes | Longest pollen tubes |
| <i>sppep2</i>            | 0.003*               | 0.005*               |
| <i>spttsl</i>            | 0.072                | 0.491                |
| <i>spttsrr</i>           | 0.513                | 0.913                |
| <i>tagp3</i>             | 0.292                | 0.792                |
| <i>sp120k</i>            | 0.153                | 0.168                |
| <i>sppelpIII-1</i>       | 0.246                | 0.277                |
| <i>sppur-1</i>           | 0.059                | 0.002*               |
| <i>spdir1l</i>           | <0.001**             | <0.001**             |

\* Significant differences (P<0.05). \*\* Significant differences (P<0.001).

**Table S3.** Sequences synthesized for CRISPR/Cas9 constructs. Specific gRNA gene-targeting sequences are bold and highlighted in pink. Yellow, Csy4 cleavage targets. Grey, protospacer. Blue, 5' BsaI sites; green, 3' SapI sites.

| Candidate gene   | DNA-synthesized fragment                                                                                                                                 |
|------------------|----------------------------------------------------------------------------------------------------------------------------------------------------------|
| <i>SpAGP3</i>    | cgTGGTCTCAGCAGATGACCAATTGATGAAGGGTTTATAGAGCTAGAAATAGCAAGTTAAAA-<br>TAAGGCTAGTCCGTTATCAACTTGAAAAAGTGGCACCAGTCGGTGC GTTCACTGCCGTATAGGCAGGT<br>CAGAAGAGCATG |
| <i>Sp120k</i>    | cgTGGTCTCAGCAGGTCCAATCCCTAACCCCTTGTATAGAGCTAGAAATAGCAAGTTAAAA-<br>TAAGGCTAGTCCGTTATCAACTTGAAAAAGTGGCACCAGTCGGTGC GTTCACTGCCGTATAGGCAGGT<br>CAGAAGAGCATG  |
| <i>SpTTSR</i>    | cgTGGTCTCAGCAGCCCTGAAGTGGTTAGCTGTTTATAGAGCTAGAAATAGCAAGTTAAAA-<br>TAAGGCTAGTCCGTTATCAACTTGAAAAAGTGGCACCAGTCGGTGC GTTCACTGCCGTATAGGCAGGT<br>CAGAAGAGCATG  |
| <i>SpPELPIII</i> | cgTGGTCTCAGCAGTGATGGCTCGTTGTCCCCGTTTATAGAGCTAGAAATAGCAAGTTAAAA-<br>TAAGGCTAGTCCGTTATCAACTTGAAAAAGTGGCACCAGTCGGTGC GTTCACTGCCGTATAGGCAGGT<br>CAGAAGAGCATG |
| <i>SpTTSL</i>    | cgTGGTCTCAGCAGTAGGGGCTTCAACAGGTGTTTATAGAGCTAGAAATAGCAAGTTAAAA-<br>TAAGGCTAGTCCGTTATCAACTTGAAAAAGTGGCACCAGTCGGTGC GTTCACTGCCGTATAGGCAGGT<br>CAGAAGAGCATG  |
| <i>SpPEP2</i>    | cgTGGTCTCAGCAGAGAGGAGATACACAGAACGTTTATAGAGCTAGAAATAGCAAGTTAAAA-<br>TAAGGCTAGTCCGTTATCAACTTGAAAAAGTGGCACCAGTCGGTGC GTTCACTGCCGTATAGGCAGGT<br>CAGAAGAGCATG |

**Table S4.** Primers used to identify and validate CRISPR/Cas9-induced mutations.

| Candidate gene   | Primer name <sup>†</sup> | Sequence                          |
|------------------|--------------------------|-----------------------------------|
| <i>SpAGP3</i>    | SpAGP3-OutF              | CGTCTGACTGTTGATCATGCTTATGT        |
|                  | SpAGP3-FlaF              | GAATGGAATTTAGGAAAATGACCAATTGATGAA |
|                  | SpAGP3-OutR              | GAGGTTATAGGAGTGATTGTTTGTGAGG      |
| <i>Sp120k</i>    | Sp120K-outF              | GTGAAGGTGGTGGTGGTGATTG            |
|                  | Sp120k-FlaF              | ACGCGTCCAATCCCTAACCC              |
|                  | Sp120k-OutR              | CAAAGGCCATGGTGCTCATACA            |
| <i>SpTTSR</i>    | SpTTSR-OutF              | GGACATTTGAAGCACGGACACTATAAG       |
|                  | SpTTSR-FlaF              | AAGAAGAAATTACCCTGAAGTGGTTTAG      |
|                  | SpTTSR-OutR              | CAGCTAAGCCACCATCACCTTATTATC       |
| <i>SpPELPIII</i> | SpPELPIII-OutF           | GTGGCGTCGTTGGGTTAATAGT            |
|                  | SpPELPIII-FlaF           | GGTGATGATGGCTCGTTGTCC             |
|                  | SpPELPIII-OutR           | GCAGGGAAAGGCGTGCTAATAC            |
| <i>SpTTSL</i>    | SpTTSL-OutF              | AACCTTCTGACCGGAAGAGGAGA           |
|                  | SpTTSL-FlaF              | AGGCTTAGGGGCTTCAACAGG             |
|                  | SpTTSL-OutR              | TTCCAATAAGTCCCTTGGGTTTATTC        |
| <i>SpPEP2</i>    | SpPEP2-OutF              | GCCTGAATTGCTTCTGTGCTCT            |
|                  | SpPEP2-FlaF              | TGCAAGCCTTTTCAACAAGTGCATTA        |
|                  | SpPEP2-OutR              | GAGCAAAGGCCAAGTCGAAAATG           |

|                |              |                                  |
|----------------|--------------|----------------------------------|
| <i>SpDIR1L</i> | SpDIR1L-OutF | CAACAAC TAGCCAAGGTCTTCATAATAATCC |
|                | SpDIR1L-FlaF | GAAATGGCCAGTGCAGATTCCTTG         |
|                | SpDIR1L-OutR | AAGTGCAAAGGCAAGGCAAATC           |
| <i>SpPUR</i>   | SpPUR-OutF   | TGCCTTATTTATCAAAGGCAAGAGCC       |
|                | SpPUR-FlaF   | TAATTGATAGATATGGGACCTATGAGC      |
|                | SpPUR-OutR   | CTACTACATGGCCCCTTGAAACTGTG       |

<sup>†</sup> OutF, forward primers outside the protospacer. FlaF, forward primers flanking protospacer. OutR, reverse primers outside the protospacer.
